# Supplementary material for: Molecular engineering for constructing a D–A system and enhancing delocalization in g-C3N4 with superior photocatalytic activity
Source: Royal Society of Chemistry journal article supplement (doi:10.1039/d2ta05482e), 2022-01-01
Supplement: d2ta05482e1.pdf [file d2ta05482e1.pdf]

**Molecular engineering for constructing D-A system and enhancing delocalization  
in g-C<sub>3</sub>N<sub>4</sub> with superior photocatalytic activity**

*Chengqun Xu,<sup>\*a</sup> Xiaolu Liu,<sup>a</sup> Haiyang Liu,<sup>a</sup> Dezhi Li,<sup>a</sup> Yuchen Yang,<sup>a</sup> Shiyin Lin,<sup>a</sup>  
Donghua Fan,<sup>a</sup> and Hui Pan<sup>\*b,c</sup>*

<sup>a</sup>School of Applied Physics and Materials, Wuyi University, Jiangmen 529020, P. R. China. E-mail: [xuchengqun2019@yeah.net](mailto:xuchengqun2019@yeah.net)

<sup>b</sup>Institute of Applied Physics and Materials Engineering, University of Macau, Macao SAR, 999078, P. R. China. Email: [huipan@um.edu.mo](mailto:huipan@um.edu.mo)

<sup>c</sup>Department of Physics and Chemistry, Faculty of Science and Technology, University of Macau, Macao SAR, 999078, P. R. China

## Photoelectrochemical property

The photocurrent was measured on a CHI 660C electrochemical workstation (Shanghai, China) using a conventional three-electrode cell, a Pt plate and an Ag/AgCl electrode as counter electrode and reference electrode, respectively. Na<sub>2</sub>SO<sub>4</sub> (0.5 mol/L) was used as the electrolyte solution. The working electrode was prepared according to the following process; FTO glass substrate was cleaned by sonication successively with distilled water, acetone and ethanol for 60 min. Meanwhile, 0.10 g of ethocel (EC) was dissolved in 25 mL of ethanol by ultrasonic dispersion. Then, 5 mg of sample (UCN and UCN-*x*TDA (*x* = 3, 4, 5 and 6 mg)) was ultrasonically dispersed in the aforementioned ethanol of 0.5 mL with EC solution. The resulting dispersion was applied dropwise onto the FTO substrate. The electrodes were sealed with epoxy resin except for the 1 cm<sup>2</sup> sample area used for photoexcitation experiment. The sample electrodes were dried in air before test. The Electrochemical impedance spectroscopy (EIS) was tested at a bias voltage of 0.2 V vs Ag/AgCl with an AC voltage of 5 mV in the dark. The frequency range were set between  $1 \times 10^{-2}$  and  $1 \times 10^5$  Hz. The photocurrent was operated using a 300 W Xe lamp (PLS-FX300HU, Beijing Perfectlight Technology Co. Ltd, China) equipped with a 420 nm cutoff filter.

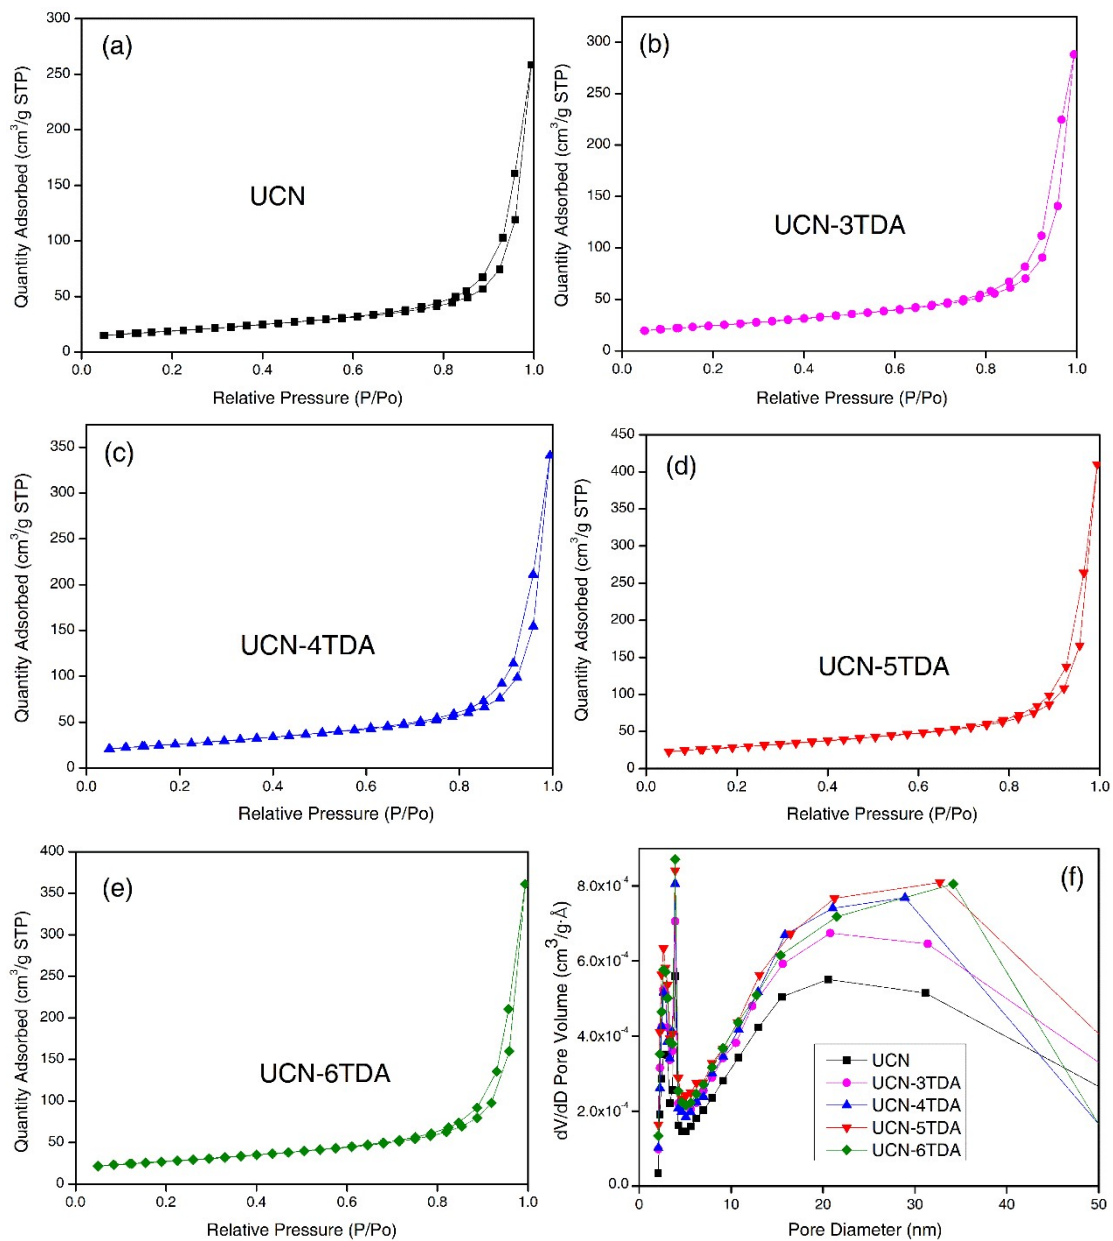

**Figure S1**  $N_2$  adsorption/desorption isotherms and pore size distribution of UCN and UCN-xTDA.

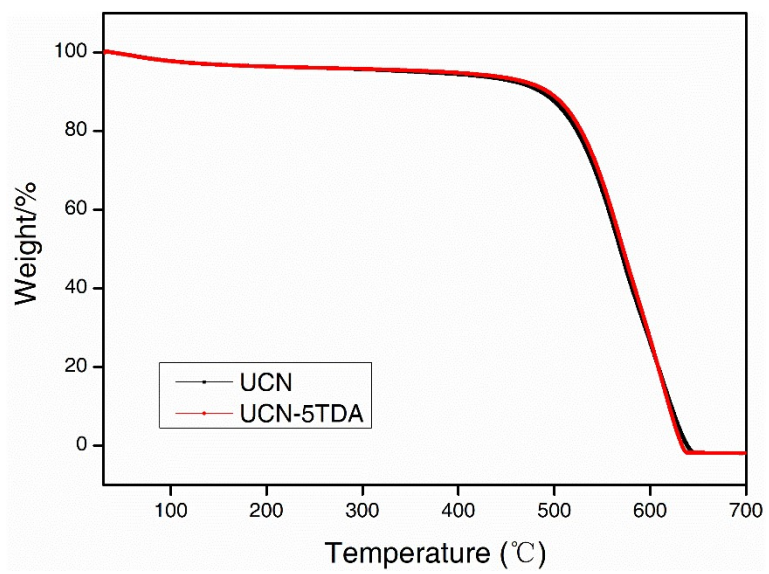

**Figure S2** TG of UCN and UCN-5TDA in N<sub>2</sub> flow.

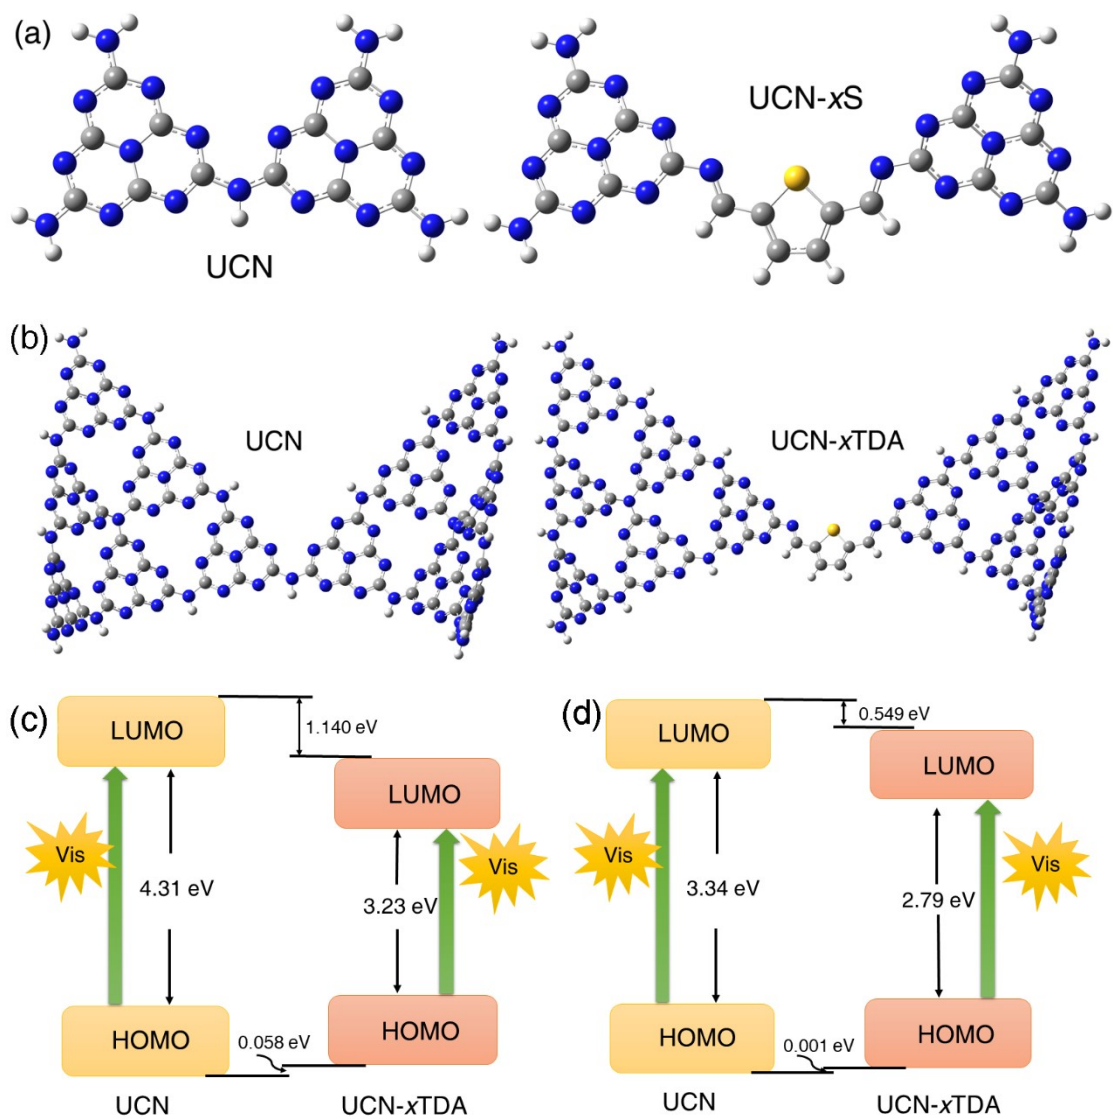

**Figure S3** the Optimized polymeric (a) monomer and (b) hexamer models and their corresponding (c, d) schematic diagram of the HOMO and LUMO for UCN and UCN-xTDA.

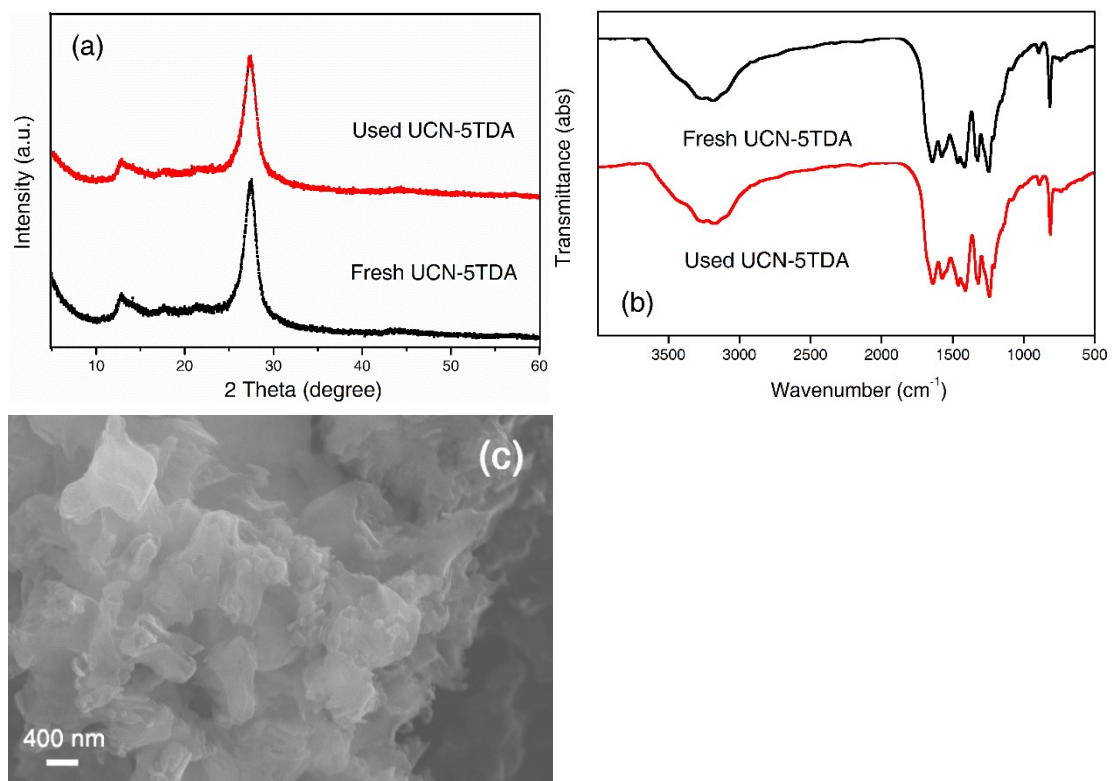

**Figure S4** (a) XRD patterns and (b) FTIR of UCN-5TDA before and after repeated irradiation; (c) SEM images of UCN-5TDA after repeated irradiation.

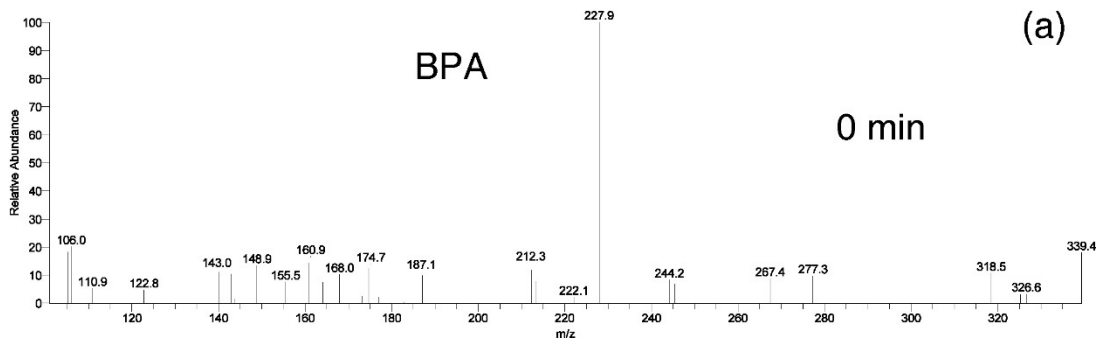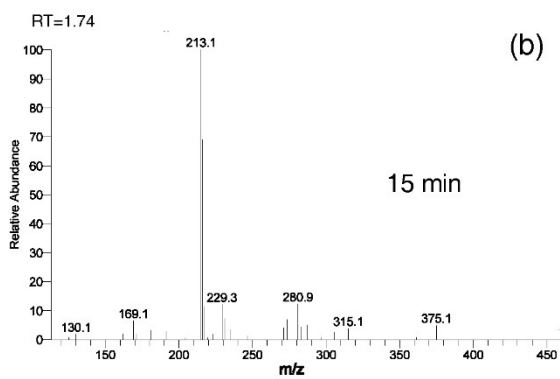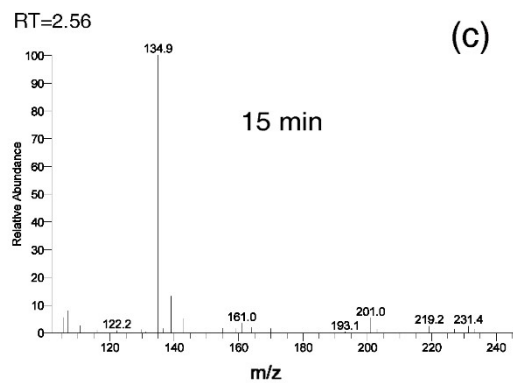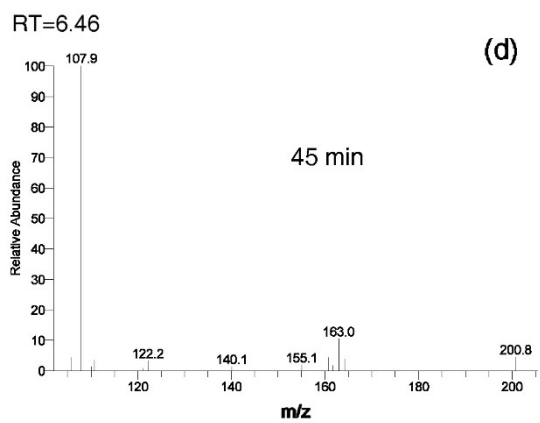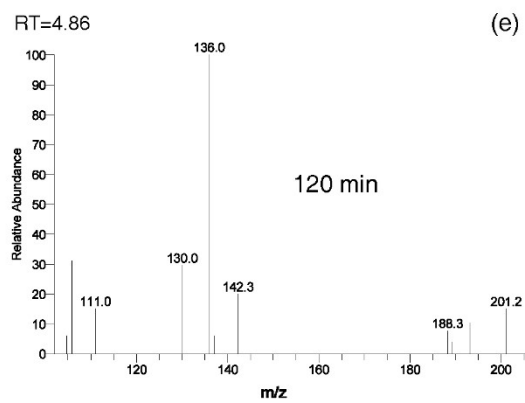

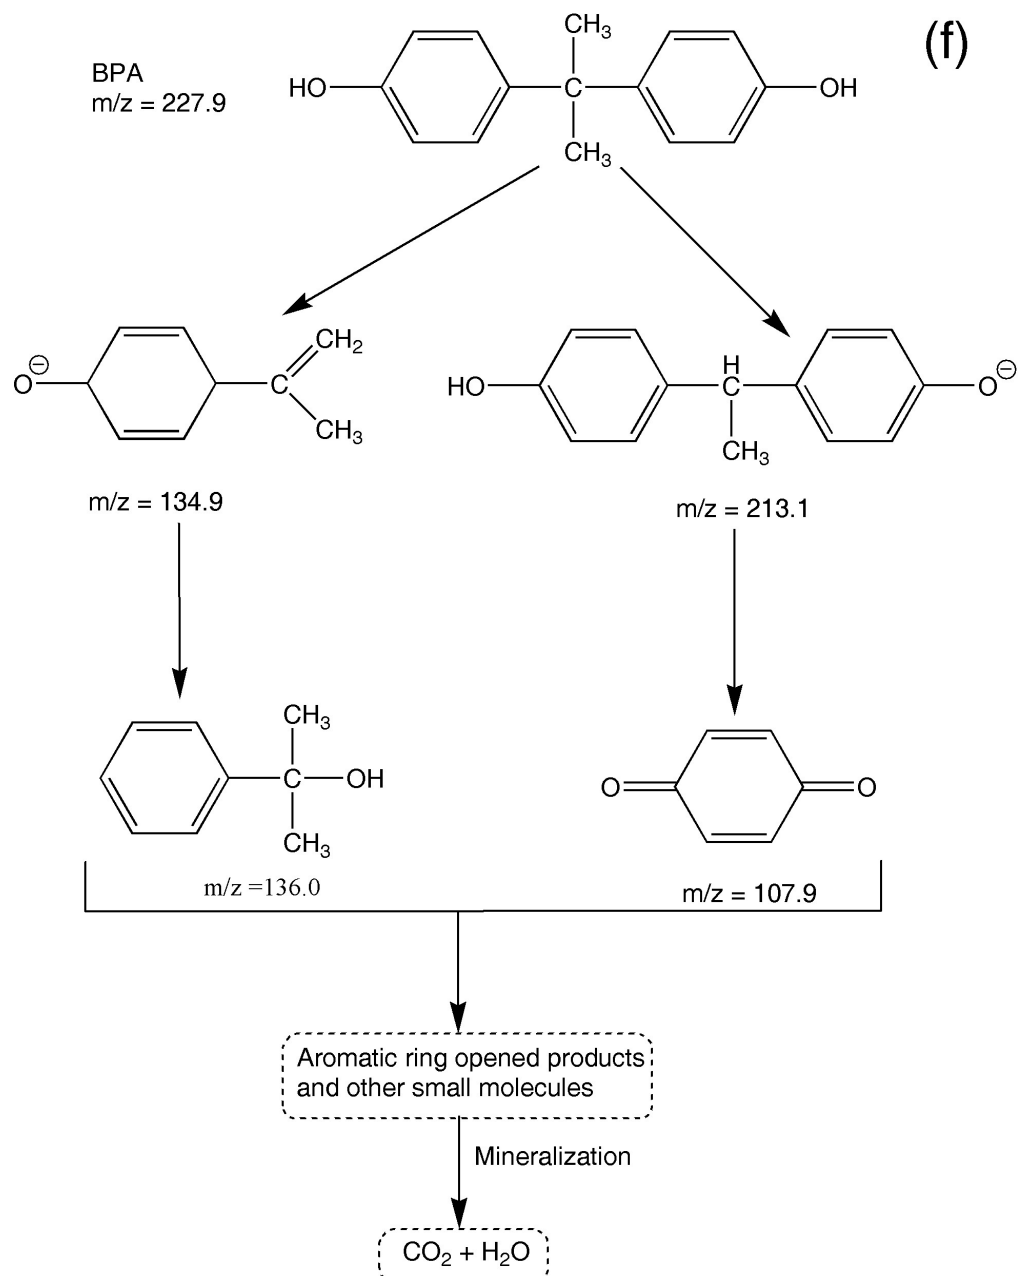

**Figure S5** (a-e) Mass spectra of by-products generated during the photodegradation of BPA after 0, 15, 45 and 120 min of irradiation; (f) Proposed degradation pathway for BPA using UCN-5TDA.



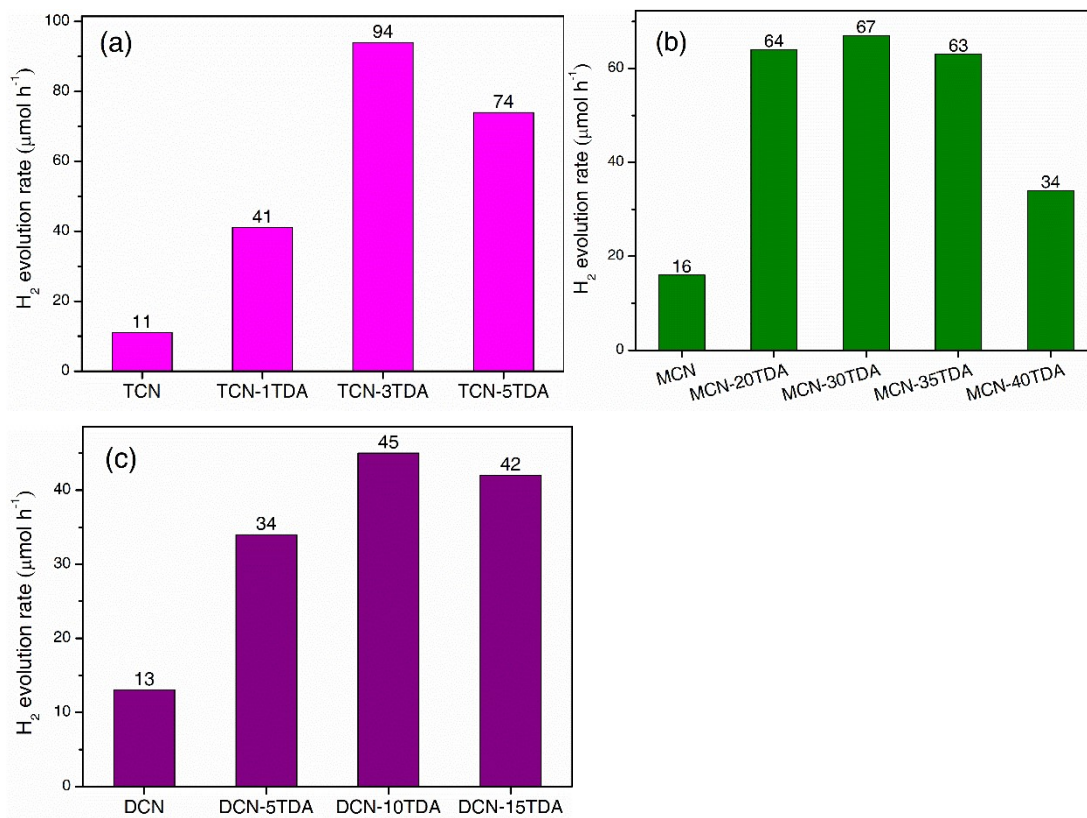

**Figure S6** hydrogen evolution rates of the photocatalyst derived from different precursors under visible light ( $\lambda > 420$  nm).

**Table S1.** Comparison of photocatalytic activity of the reported g-C<sub>3</sub>N<sub>4</sub>.

| Catalyst                                            | Light Source                      | Reaction Conditions                                            | HER (mmol h <sup>-1</sup> g <sup>-1</sup> ) | Apparent quantum efficiency                                          | Ref.             |
|-----------------------------------------------------|-----------------------------------|----------------------------------------------------------------|---------------------------------------------|----------------------------------------------------------------------|------------------|
| UCN-5TDA                                            | 300 W Xe lamp, $\lambda > 420$ nm | 3 wt% of Pt; Aqueous TEOA solution(10 vol%)                    | 12.35                                       | 40.5% (400 nm)<br>13.3% (450 nm)<br>7.93% (500 nm)<br>1.25% (550 nm) | <b>This work</b> |
| UCN-BI <sub>400</sub>                               | 300 W Xe lamp, $\lambda > 420$ nm | 3 wt% of Pt; Aqueous TEOA solution(20 vol%)                    | 5.44                                        | 23.3% (420 nm)<br>7% (450 nm)<br>3% (500 nm)<br>0.5% (550 nm)        | [1]              |
| UCN-4TAPB                                           | 300 W Xe lamp, $\lambda > 420$ nm | 3 wt% of Pt; Aqueous TEOA solution(10 vol%)                    | 10.55                                       | 40.0% (400 nm)<br>3.8% (500 nm)                                      | [2]              |
| UCN-BD                                              | 300 W Xe lamp, $\lambda > 420$ nm | 3 wt% of Pt; Aqueous TEOA solution(10 vol%)                    | 3.43                                        | 12.3% (450 nm)                                                       | [3]              |
| PTI-0.13                                            | 300 W Xe lamp, $\lambda > 420$ nm | 3 wt% of Pt; Aqueous TEOA solution(10 vol%)                    | 8.16                                        | 15% (400 nm)<br>7.0% (420 nm)<br>4.6% (450 nm)<br>0.8% (550 nm)      | [4]              |
| O-CN2                                               | 300 W Xe lamp, $\lambda > 420$ nm | 1 wt% of Pt; Aqueous Lactic acid solution (10 vol%)            | 1.06                                        | 13.2% (420 nm)<br>4.5% (450 nm)<br>1.5% (500 nm)<br>1.0% (550 nm)    | [5]              |
| UCN-10                                              | 300 W Xe lamp, $\lambda > 420$ nm | 3 wt% of Pt; Aqueous TEOA solution(10 vol%)                    | 2.33                                        | 8.2% (450 nm)                                                        | [6]              |
| UM3                                                 | 300 W Xe lamp, $\lambda > 420$ nm | 1 wt% of Pt; Aqueous Lactic acid solution (20 vol%)            | 3.58                                        | 27.8% (420 nm)<br>12% (450 nm)<br>7% (500 nm)                        | [7]              |
| g-C <sub>3</sub> N <sub>4</sub> (urea)              | 300 W Xe lamp, $\lambda > 395$ nm | 3 wt% of Pt; Aqueous TEOA solution(13 vol%)                    | 3.33                                        | 26.5% (400 nm)<br>12.5% (420 nm)<br>4% (450 nm)                      | [8]              |
| g-C <sub>3</sub> N <sub>4</sub> (urea and thiourea) | 300 W Xe lamp, $\lambda > 400$ nm | 1 wt% of Pt; Aqueous methanol solution (20vol%), pH=13.3 (KOH) | 2.23                                        | 6.67% (400 nm)                                                       | [9]              |
| MCN-1                                               | 300 W Xe lamp, $\lambda > 420$ nm | 3 wt% of Pt; Aqueous TEOA solution (10vol%)                    | 0.60                                        | 7.8% (420 nm)                                                        | [10]             |

- [1] H. Che, C. Li, C. Li, C. Liu, H. Dong and X. Song, *Chemical Engineering Journal*. 410 (2021) 127791.
- [2] C. Xu, X. Liu, D. Li, Z. Chen, J. Yang, J. Huang and H. Pan, *ACS Applied Materials & Interfaces*. 13 (2021) 20114-20124.
- [3] K. Li and W. D. Zhang, *Small*. 14 (2018) 1703599.
- [4] M. K. Bhunia, K. Yamauchi and K. Takanahe, *Angewandte Chemie International Edition*. 53 (2014) 11001-11005.
- [5] C. Liu, H. Huang, W. Cui, F. Dong and Y. Zhang, *Applied Catalysis B: Environmental*. 230 (2018) 115-124.
- [6] F.-Y. Su and W.-D. Zhang, *Molecular Catalysis*. 432 (2017) 64-75.
- [7] N. Tian, Y. Zhang, X. Li, K. Xiao, X. Du, F. Dong, G. I. Waterhouse, T. Zhang and H. Huang, *Nano Energy*. 38 (2017) 72-81.
- [8] D. J. Martin, K. Qiu, S. A. Shevlin, A. D. Handoko, X. Chen, Z. Guo and J. Tang, *Angewandte Chemie International Edition*. 53 (2014) 9240-9245.
- [9] P. Wu, J. Wang, J. Zhao, L. Guo and F. E. Osterloh, *Chemical Communications*. 50 (2014) 15521-15524.
- [10] Z.-F. Huang, J. Song, L. Pan, Z. Wang, X. Zhang, J.-J. Zou, W. Mi, X. Zhang and L. Wang, *Nano Energy*. 12 (2015) 646-656.
